# Supplementary material for: Muscle weakness and mitochondrial stress occur before severe metastasis in a novel mouse model of ovarian cancer cachexia
Source: PubMed Central journal article supplement — Mol Metab. 2024 Jun 24;86:101976. doi: 10.1016/j.molmet.2024.101976 (PMC11278933; doi:10.1016/j.molmet.2024.101976), 2024-06-24
Supplement: mmc1.pdf [file mmc1.pdf]

# SFigure 1

A

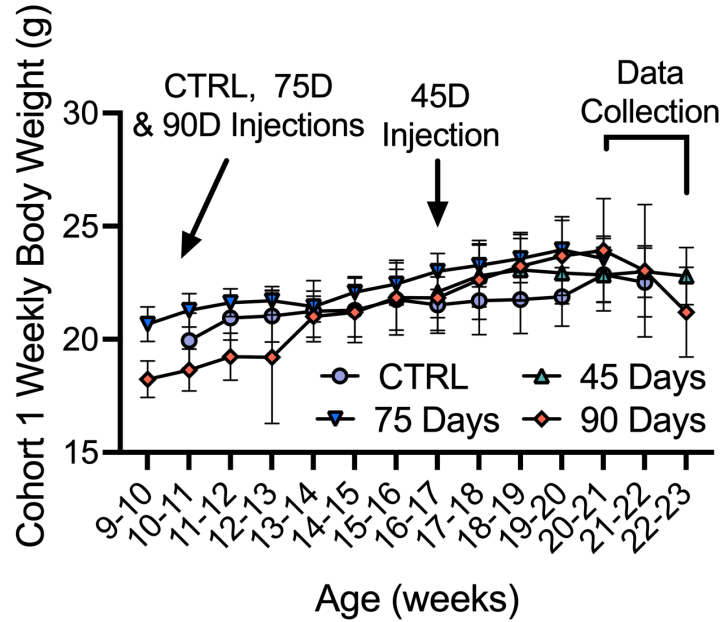

B

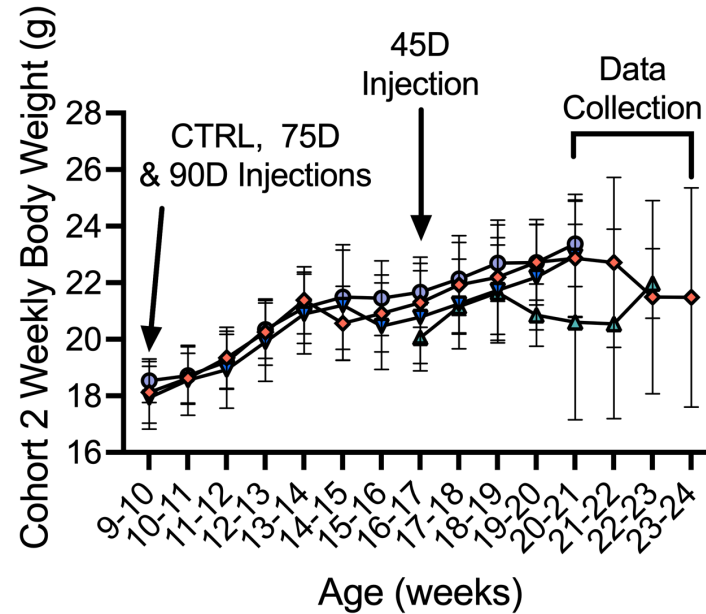

**SFigure 1. Weekly body weights and age of EOC injections throughout study.** This study used two mice per “n” from separate cohorts to obtain enough tissue to complete all experiments. Weekly body weights were measured in mice from cohort 1 (A, n =12) and cohort 2 (B, n =12). Results represent mean  $\pm$  SD. All data was analyzed using a one-way ANOVA and followed by a two-stage step-up method of Benjamini, Krieger and Yukutieli multiple comparisons test. C57BL/6J female mice ~75 days post PBS injection as controls (CTRL); C57BL/6J female mice ~45 days post ovarian cancer injection (45 Days); C57BL/6J female mice ~75 days post ovarian cancer injection (75 Days); C57BL/6J female mice ~90 days post ovarian cancer injection (90 Days).

# SFigure 2

D2.mdx: 0 $\mu$ g/mL anti-eMHC Antibody

D2.mdx: 16 $\mu$ g/mL anti-eMHC Antibody

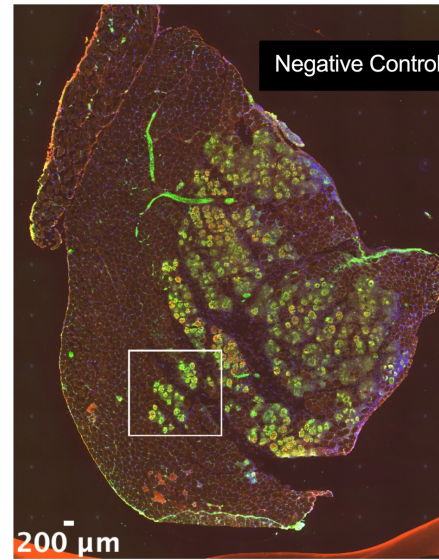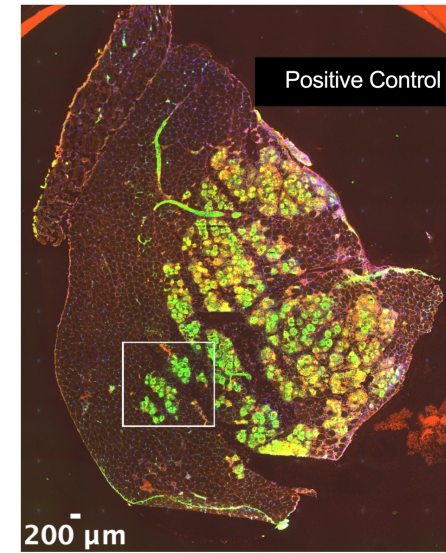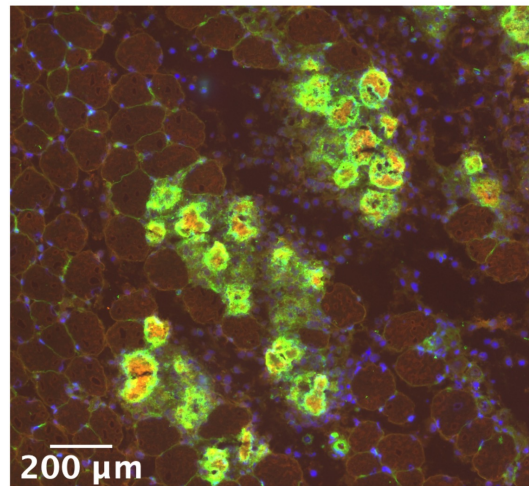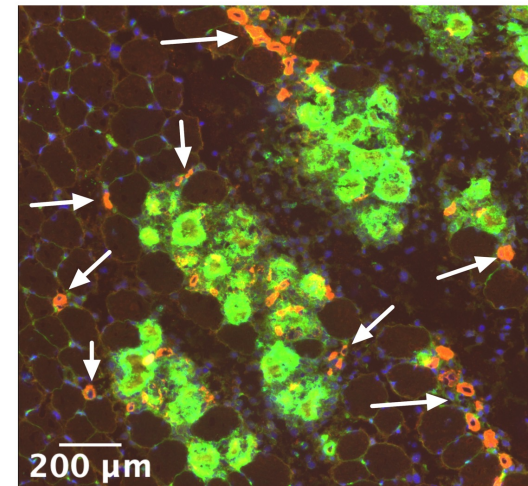

**SFigure 2. Positive and negative control experiments of eMHC protocol.** Tibialis anterior muscle from D2.mdx mice were used as a positive control to validate the eMHC histology technique. Technical replicates of the same tissue were incubated with no eMHC antibody (left) and with 16 $\mu$ g/mL of eMHC primary antibody (right).

# SFigure 3

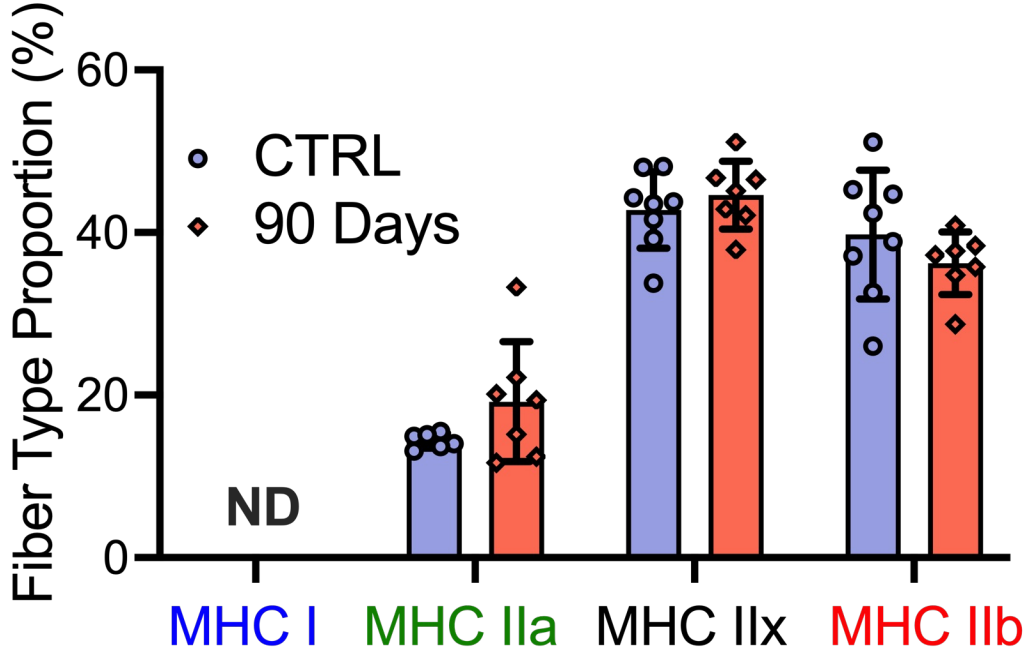

**SFigure 3. Fiber type analysis of red tibialis anterior.** Fiber type distribution of type IIa, type IIx and type IIb. n=7-8. Results represent mean  $\pm$  SD. All data was analyzed using an unpaired T-Test. C57BL/6J female mice ~75 days post PBS injection as controls (CTRL); C57BL/6J female mice ~90 days post ovarian cancer injection (90 Days).

# SFigure 4

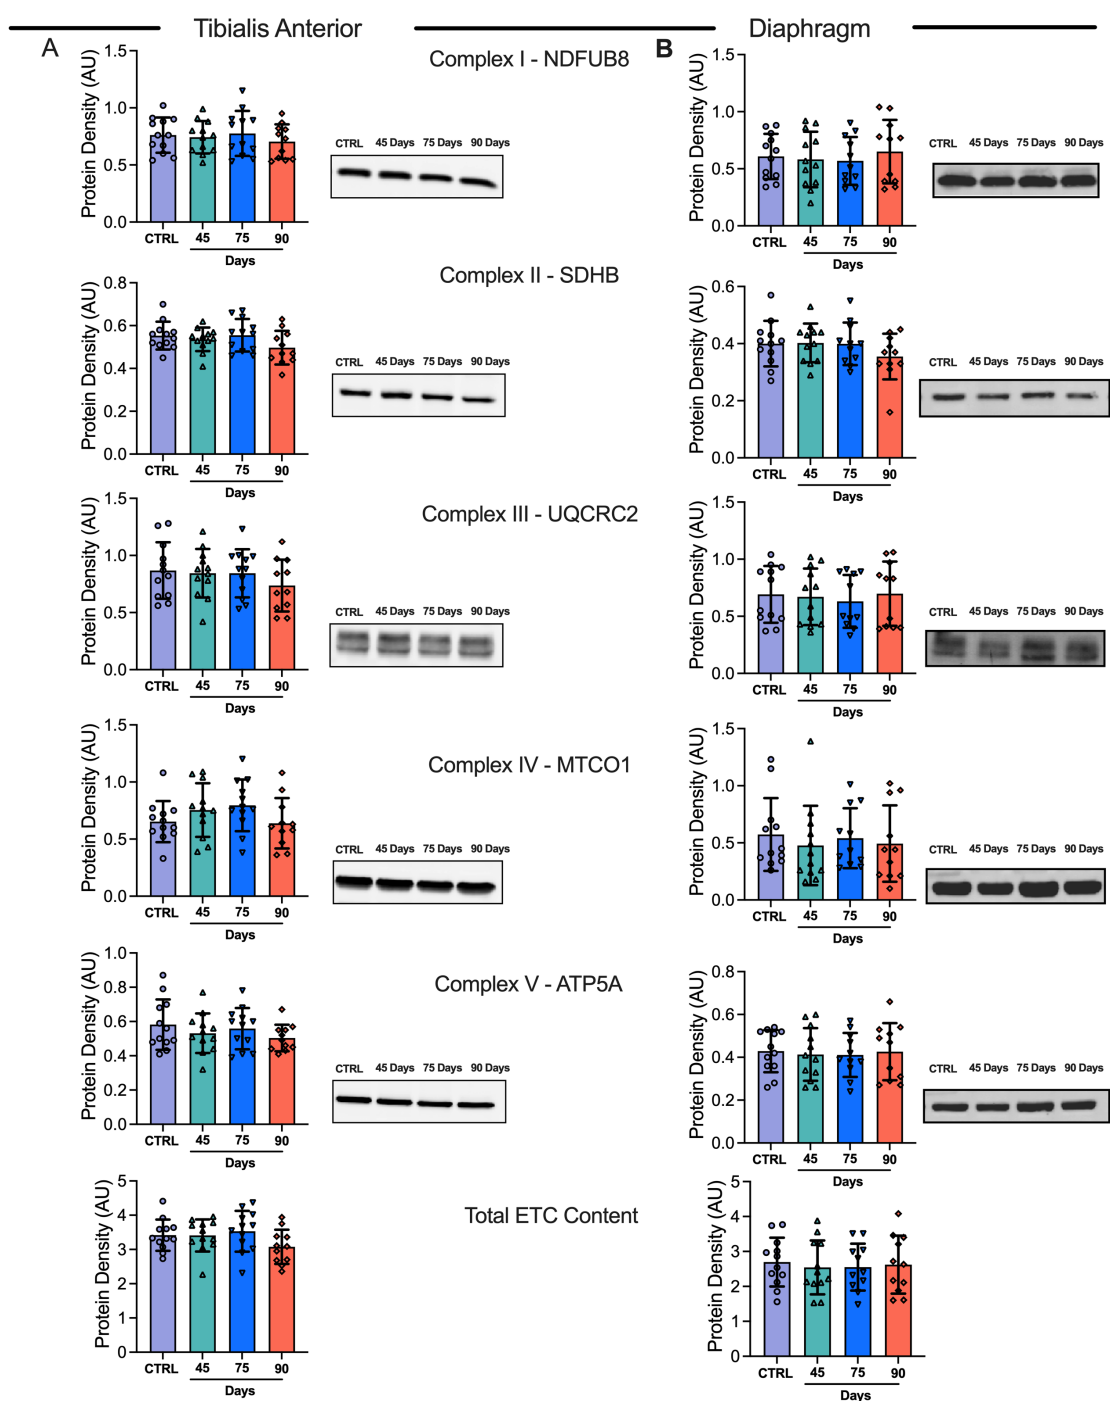

**SFigure 4. Muscle-specific evaluation of electron transport chain (ETC) complex subunit markers in EOC injected tibialis anterior and diaphragm skeletal muscle.** Protein content of ETC subunits was quantified in the tibialis anterior (**A**,  $n = 12$ ) and diaphragm (**B**,  $n = 12$ ) Results represent mean  $\pm$  SD. All data was analyzed using a one-way ANOVA or Kruskal-Wallis test when data did not fit normality. All ANOVAs were followed by a two-stage step-up method of Benjamini, Krieger and Yukutieli multiple comparisons test. C57BL/6J female mice  $\sim$ 75 days post PBS injection as controls (CTRL); C57BL/6J female mice  $\sim$ 45 days post ovarian cancer injection (45 Days); C57BL/6J female mice  $\sim$ 75 days post ovarian cancer injection (75 Days); C57BL/6J female mice  $\sim$ 90 days post ovarian cancer injection (90 Days).

# SFigure 5

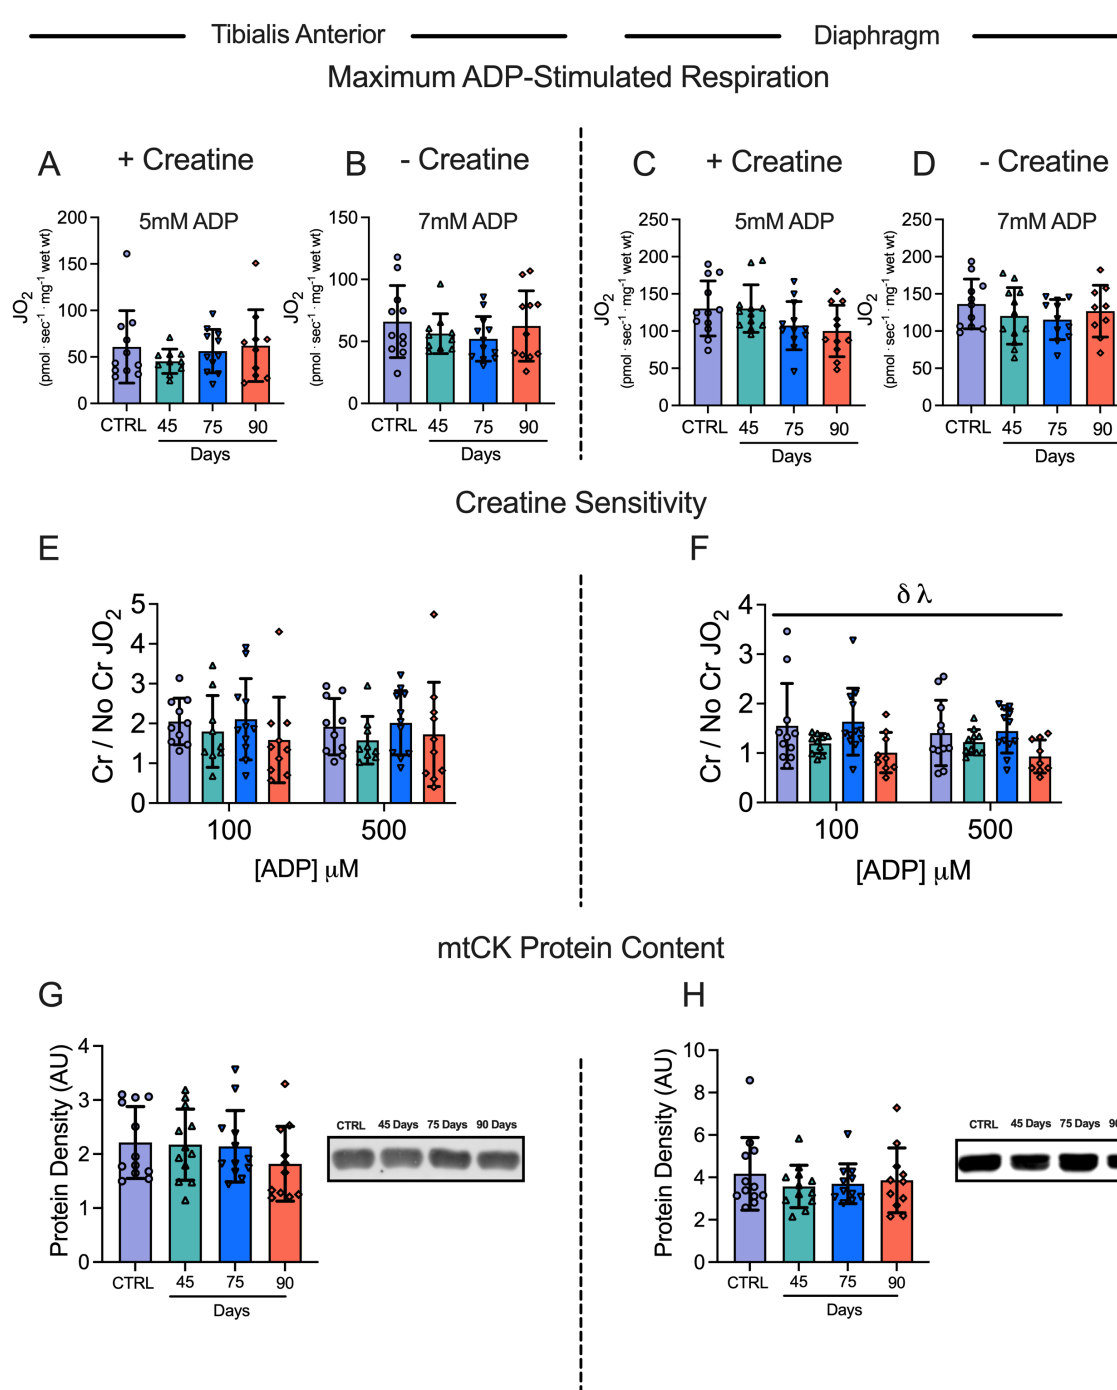

**SFigure 5. Maximum ADP-stimulated respiration, creatine sensitivity ratios and mitochondrial creatine kinase (mtCK) protein content in tibialis anterior and diaphragm muscle of EOC injected mice.** Maximum ADP-stimulated mitochondrial respiration was evaluated in the tibialis anterior and diaphragm both in the presence and absence of creatine (**A-D**,  $n = 9-12$ ). A ratio of +Creatine/-Creatine respiration in the tibialis anterior and diaphragm muscle was generated at 100 $\mu$ M and 500 $\mu$ M (apparent  $K_m$  of mtCK) as an index of creatine sensitivity (**E & F**,  $n = 9-12$ ). mtCK protein content was also quantified in both muscles ( $n = 12$ ). Results represent mean  $\pm$  SD.  $\lambda p < 0.05$  75 Day vs 90 Day;  $\delta p < 0.05$  Control versus 90 Day. Figures A-D, G and H were analyzed using a one-way ANOVA or Kruskal-Wallis test when data did not fit normality. Figures E and H were analyzed using a two-way ANOVA (main effect shown only). All ANOVAs were followed by a two-stage step-up method of Benjamini, Krieger and Yukutieli multiple comparisons test. C57BL/6J female mice  $\sim$ 75 days post PBS injection as controls (CTRL); C57BL/6J female mice  $\sim$ 45 days post ovarian cancer injection (45 Days); C57BL/6J female mice  $\sim$ 75 days post ovarian cancer injection (75 Days); C57BL/6J female mice  $\sim$ 90 days post ovarian cancer injection (90 Days).

# SFigure 6

L-carnitine + palmitoyl coenzyme A + malate

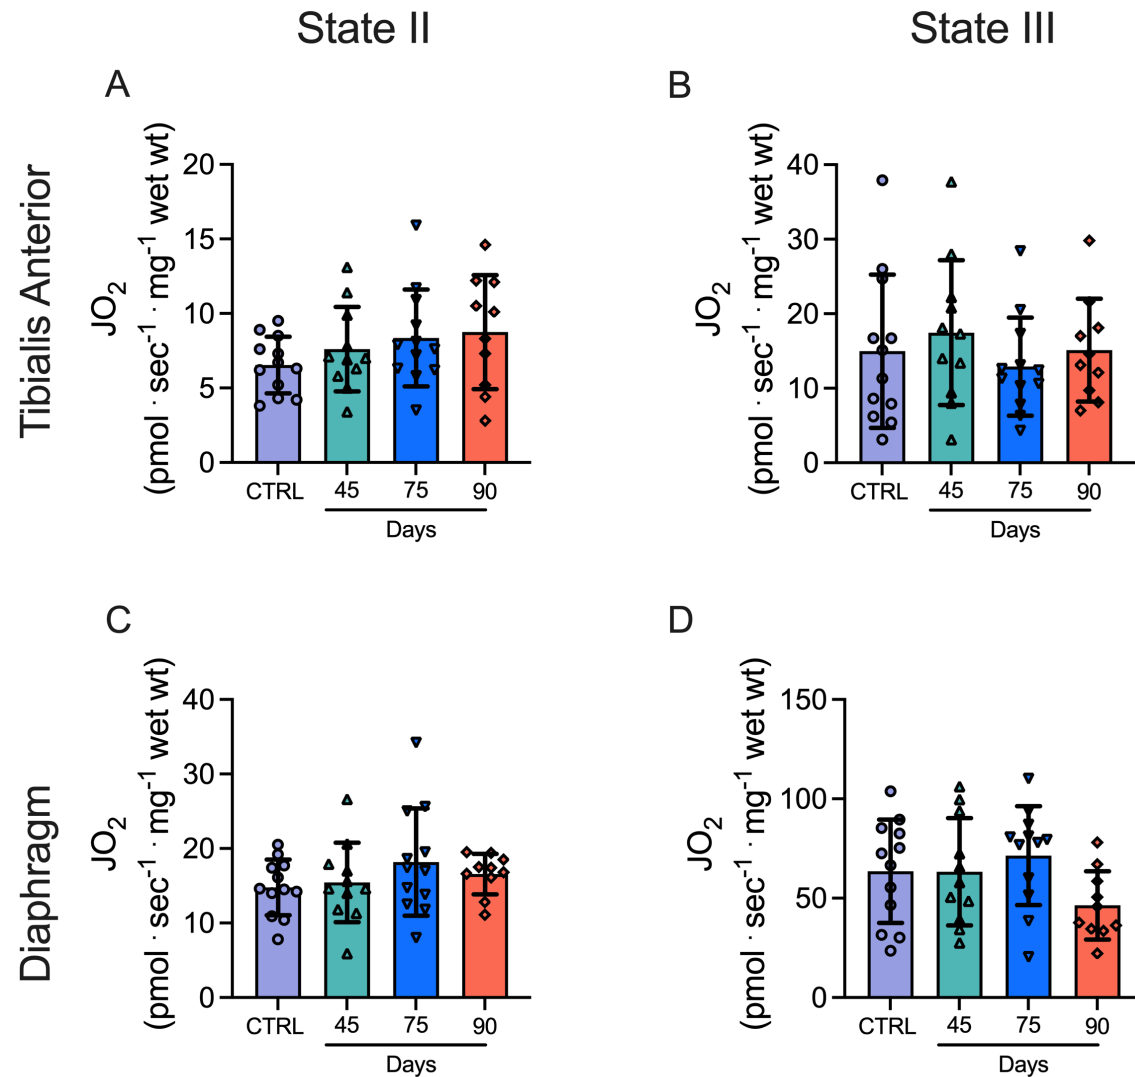

**SFigure 6. Fatty acid-supported mitochondrial respiration in tibialis anterior and diaphragm of EOC injected mice.** State II (L-carnitine + palmitoyl coenzyme A + malate; absence of ADP) mitochondrial respiration was evaluated in the tibialis anterior and diaphragm muscle in the presence of 20mM creatine (**A & C**, n = 10-12). State III (5mM ADP) mitochondrial respiration was also evaluated in TA and diaphragm muscle (**B & D**, n = 10-12). Results represent mean  $\pm$  SD. All data was analyzed using a one-way ANOVA or Kruskal-Wallis test when data did not fit normality. All ANOVAS were followed by a two-stage step-up method of Benjamini, Krieger and Yukutieli multiple comparisons test. C57BL/6J female mice ~75 days post PBS injection as controls (CTRL); C57BL/6J female mice ~45 days post ovarian cancer injection (45 Days); C57BL/6J female mice ~75 days post ovarian cancer injection (75 Days); C57BL/6J female mice ~90 days post ovarian cancer injection (90 Days).

# SFigure 7

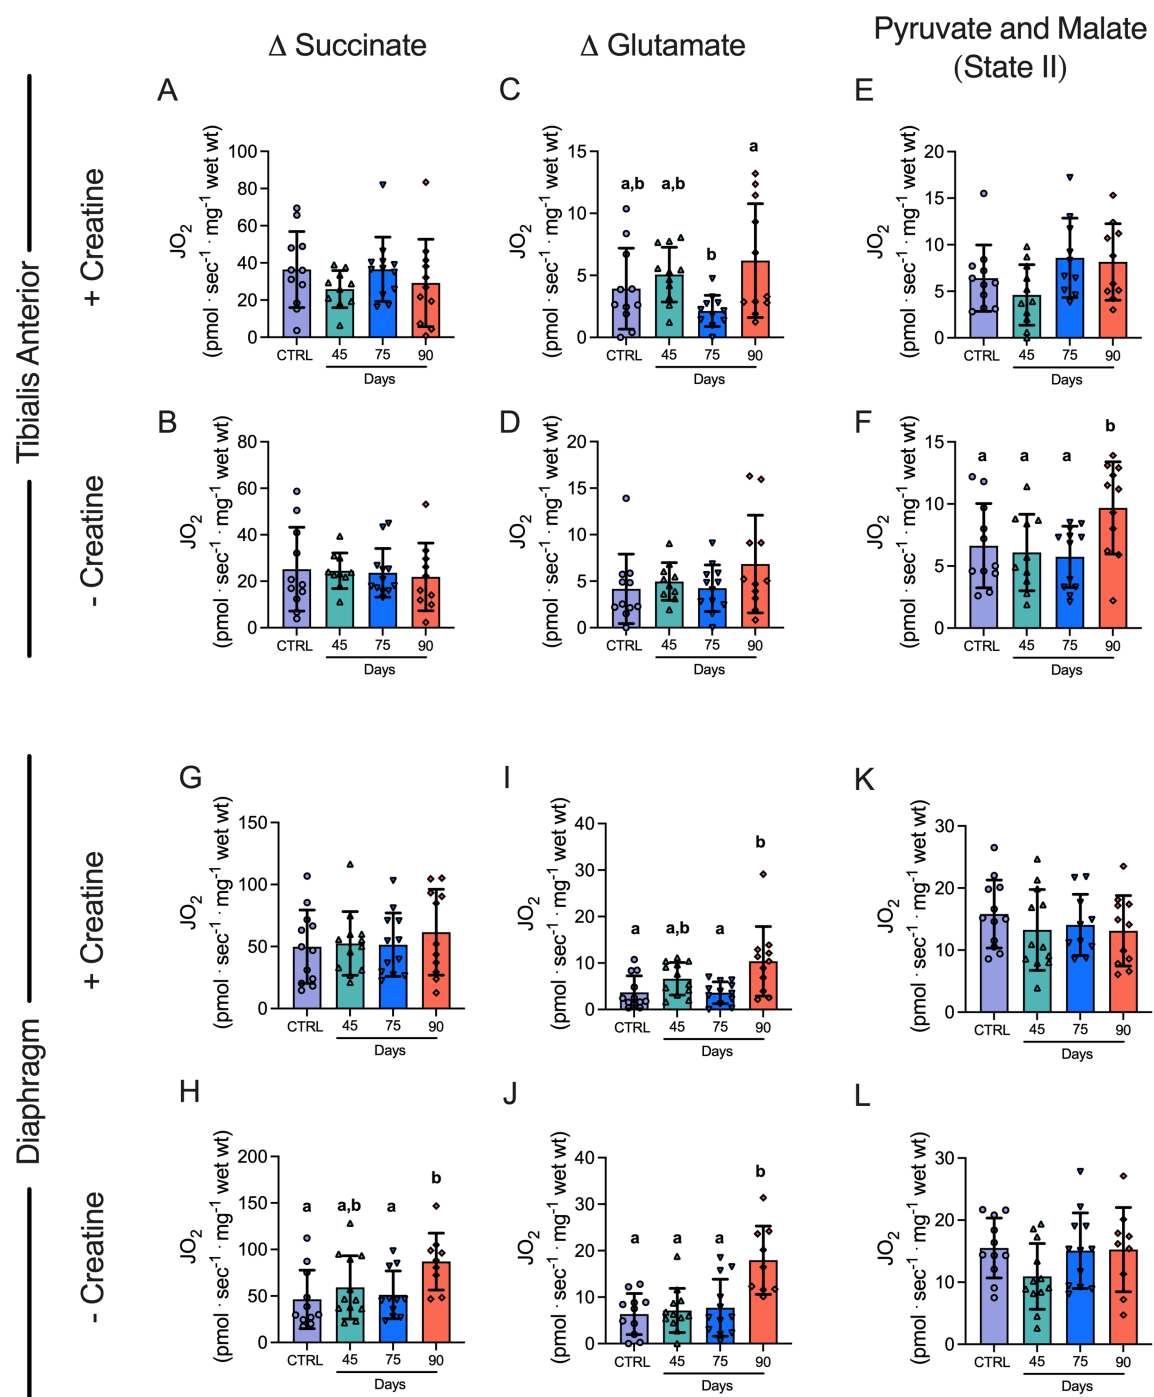

**SFigure 7. Multiple substrate evaluation of oxygen consumption in tibialis anterior and diaphragm of EOC injected mice.** Oxygen consumption was evaluated in tibialis anterior bundles using succinate both in the presence and absence of creatine (**A & B**). Glutamate-supported respiration was also evaluated in the presence and absence of creatine (**C & D**). State. II (absence of ADP) was also evaluated in the presence and absence of creatine (**E & F**). This was repeated in the diaphragm (**G-L**). Results represent mean ± SD. n = 9-12. Lettering denotes statistical significance when different from each other ( $p < 0.05$ ). All data was analyzed using a one-way ANOVA or Kruskal-Wallis test when data did not fit normality. All ANOVAs were followed by a two-stage step-up method of Benjamini, Krieger and Yukutieli multiple comparisons test. C57BL/6J female mice ~75 days post PBS injection as controls (CTRL); C57BL/6J female mice ~45 days post ovarian cancer injection (45 Days); C57BL/6J female mice ~75 days post ovarian cancer injection (75 Days); C57BL/6J female mice ~90 days post ovarian cancer injection (90 Days).

# SFigure 8

## Mitochondrial Respiration

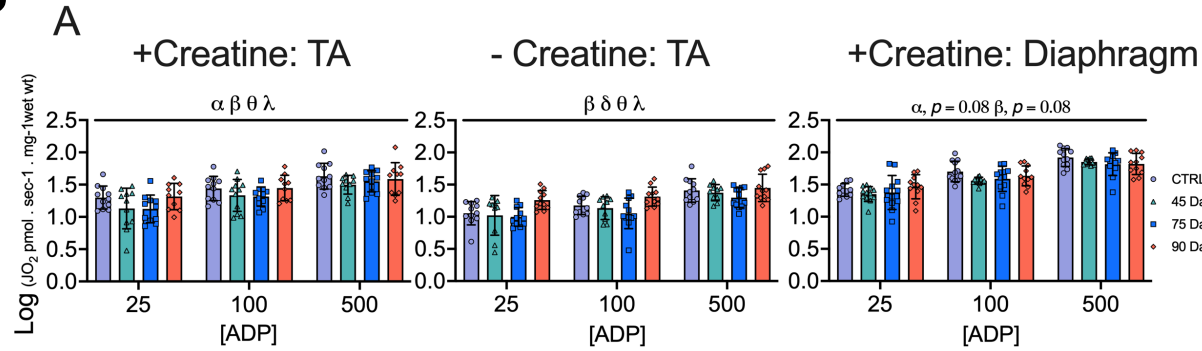

## Tibialis Anterior: $\text{H}_2\text{O}_2$ emission

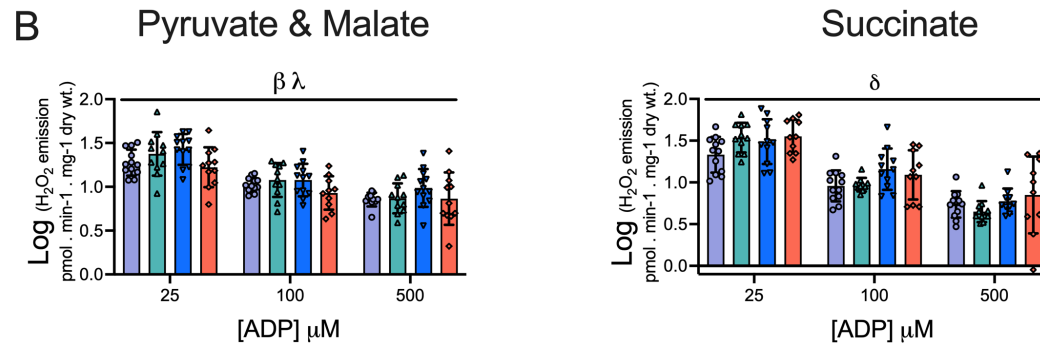

## Diaphragm: $\text{H}_2\text{O}_2$ emission

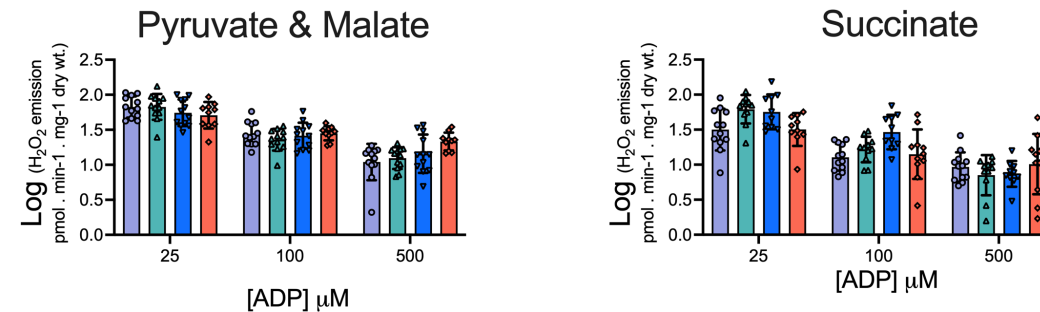

**SFigure 8. Log transformed data for analysis in tibialis anterior and diaphragm that did not fit a normal distribution.** Data that did not fit normality were log transformed and then analyzed using standard 2-way ANOVAs. Results represent mean  $\pm$  SD. n = 9-12.  $\alpha$   $p < 0.05$  Control versus 45 Day;  $\beta$   $p < 0.05$  Control versus 75 Day;  $\delta$   $p < 0.05$  Control versus 90 Day;  $\theta$   $p < 0.05$  45 Day versus 90 Day;  $\lambda$   $p < 0.05$  75 Day vs 90 Day. All Data were analyzed using a two-way ANOVA. All ANOVAs were followed by a two-stage step-up method of Benjamini, Krieger and Yukutieli multiple comparisons test. C57BL/6J female mice  $\sim$ 75 days post PBS injection as controls (CTRL); C57BL/6J female mice  $\sim$ 45 days post ovarian cancer injection (45 Days); C57BL/6J female mice  $\sim$ 75 days post ovarian cancer injection (75 Days); C57BL/6J female mice  $\sim$ 90 days post ovarian cancer injection (90 Days).



# STable 1

| Oligo name              | Oligo sequence (5' to 3') |
|-------------------------|---------------------------|
| m-actb Fwd              | CATTGCTGACAGGATGCAGAAGG   |
| m-actb Rev              | TGCTGGAAGGTGGACAGTGAGG    |
| m-TNFa Fw               | AGAATGAGGCTGGATAAGAT      |
| m-TNFa Rev              | GAGGCAACAAGGTAGAGA        |
| m-IL6 Fw                | ACAGAAGGAGTGGCTAAG        |
| m-IL6 Rev               | AGAGAACAACATAAGTCAGATAC   |
| m-Murf1 Fw              | ACCTGCTGGTGGAAAACATC      |
| m-Murf1 Rev             | AGGAGCAAGTAGGCACCTCA      |
| m-Atrogin1 Fw           | AGCGCTTCTTGGATGAGAAA      |
| m-Atrogin1 Rev          | ACGTCGTAGTTCAGGCTGCT      |
| m-RyR1 Fw               | TGCTCAAGGAACAGCTGAAG      |
| m-RyR1 Rev              | GGGCTCGAACTGACAGAGAC      |
| m-Serca 1 (Atp2a1) -Fw  | ACACAGACCCTGTCCCTGAC      |
| m-Serca 1 (Atp2a1) -Rev | TGCAGTGGAGTCTTGTCTG       |
| m-Serca 2 (Atp2a2) -Fw  | TACTGACCCTGTCCCTGACC      |
| m-Serca 2 (Atp2a2) -Rev | CACCACCACTCCCATAGC        |

**STable 1. List of primers used for qtPCR.**
